# Supplementary material
Source: PubMed Central journal article supplement (PMC7211468)
Supplement: rsbl20200070supp1.pdf [file rsbl20200070supp1.pdf]

## 1 Supplemental Methods

### 2 **Genome mining**

3 We mined publicly available reference genomes (NCBI) of 85 mammals, spanning 21 orders  
4 and feeding on a variety of diets (Fig. 1a) for *ADH7* gene sequences. We confirmed the  
5 automated NCBI gene annotations via TBlastN searches, using *ADH7* exon sequences from  
6 humans or a close relative as queries. For some exons the sequences of other *ADH* genes can  
7 be quite similar, resulting in multiple BLAST matches, however, we could exclude these hits by  
8 taking into account the genomic context and identities of the neighboring exons. Several  
9 genomes, especially for members of Carnivora, such as *Canis lupus familiaris* (domestic dog)  
10 and *Vulpes vulpes* (red fox), did not contain an annotation for *ADH7*, but we identified partial  
11 sequences through TBlastN searches. For some species all attempts to identify *ADH7* or partial  
12 sequences failed and the status of the gene as either functional or pseudogenised is, therefore,  
13 unknown. This was the case for *Choloepus hoffmanni* (Hoffmann's two-toed sloth), *Trichechus*  
14 *manatus* (West Indian manatee), *Oryctolagus cuniculus* (European rabbit), *Procavia capensis*  
15 (rock hyrax), platypus (*Ornithorhynchus anatinus*), and *Manis pentadactyla* (Chinese pangolin).  
16 Data for *Elephas maximus* and *Mammuthus primigenius* were obtained from published mapping  
17 data of reads mapped to the *Loxodonta africana* assembly [1].

18

19 All exon sequences were concatenated into coding sequences, translated and aligned with  
20 Geneious 9.1.8, and manually inspected for the presence of premature stop codons. We  
21 classified a sequence as a pseudogene if we observed at least one mutation that introduced a  
22 premature stop codon within the coding sequence of *AHD7*. Mutations that introduce stop  
23 codons can be in the form of point mutations that alter the codon to code for a stop codon  
24 (nonsense mutations) or in the form of frame-shift mutations, where an insertion or deletion  
25 alters the reading frame and introduces downstream stop codons. We acknowledge that the  
26 lack of an internal stop codon does not necessarily prove that a gene is not a pseudogene [2],

27 so we classify genes lacking an internal stop codon as putatively functional for the purposes of  
28 this study.

### 29 **Timing of gene loss**

30 To estimate the timing of the loss of *ADH7* in branches with premature stop codons, we followed  
31 the method described in Meredith et al. [3]. This method uses ratios of non-synonymous to  
32 synonymous substitutions (dN/dS, omega) acting on pseudogenised, functional, and transitional  
33 (“mixed”) branches (Fig. S5), along with branch lengths to estimate when the shift from purifying  
34 to relaxed selection (signaling pseudogenisation) occurred. We calculated average dN/dS ratios  
35 with PAML using three-ratio models in codeml for two different codon substitution models (F1X4  
36 and F3X4). We had to exclude some species from this analysis, because only partial sequences  
37 were available for *ADH7*: *Canis lupus*, *Orcinus orca*, *Tursiops truncatus*, *Orycteropus afer*,  
38 *Vulpes vulpes*. For species which had multiple *ADH7* sequences (marsupials), we included only  
39 one sequences, choosing the one with the highest average percentage of identical bases to the  
40 other mammals. We used a non-mammalian *ADH7* sequence as an outgroup (*Xenopus*  
41 *tropicalis*). The alignment used for PAML analyses was trimmed to exclude regions with a large  
42 number of gaps and manually adjusted to ensure that alignments remained in frame. For  
43 pseudogenised sequences, this required removing frameshift-causing indels and removing stop  
44 codons caused by point mutations. PAML removes sites in the alignment that contain gaps, so  
45 to avoid losing too much of our aligned sequences and retain enough sites to be informative, we  
46 filled gaps within exons with sequences from the sister taxon for some sequences. Control and  
47 input files for codeml analyses can be found at  
48 [https://github.com/MareikeJaniak/Mammal\\_ADH\\_IV](https://github.com/MareikeJaniak/Mammal_ADH_IV). Branch lengths were obtained from  
49 TimeTree [4]. The amount of time that a branch has been pseudogenetic ( $T_p$ ) is calculated by  
50 subtracting the amount of time that the branch is inferred to have been under purifying selection  
51 ( $T_i$ ), which is determined by the following formula:

52 
$$T_f = T - \left( \frac{T \times (\omega_m - \omega_p)}{(\omega_f - \omega_p)} \right)$$

53 Where T is the length of the mixed branch,  $\omega_m$  is the dN/dS ratio of the mixed branch,  $\omega_p$  is the  
54 dN/dS ratio of pseudogenised branches, and  $\omega_f$  is the dN/dS ratio of functional branches.

55 Because the two different substitution models used to calculate dN/dS ratios resulted in slightly  
56 different estimates of  $T_p$ , we used the mean of the two numbers to determine gene inactivation  
57 dates. If pseudogenisation occurred on a terminal branch (*Equus*, *Ceratotherium*, *Cavia*, *Castor*,  
58 *Octodon*, *Dasybus*)  $T_p$  is equal to the inactivation date in millions of years ago. If gene loss  
59 occurred on an internal branch (Bovidae, Elephantidae, Cetacea, Carnivora), the length of  
60 branches leading to the tip was added to arrive at the inactivation date (Table S2).

### 61 **Phylogenetic Logistic Regression**

62 To test the hypotheses that *ADH7* was (a) more likely to be to be retained in  
63 frugivorous/nectarivorous lineages or (b) more likely to be lost in herbivorous lineages, we  
64 performed phylogenetic logistic regression analyses using two different methods in the R  
65 package phyolm [5], following [6]. Briefly, we implemented the logistic\_IG10 and logistic\_MPLE  
66 methods in the function “phyloglm” with (a) percent of fruit and/or nectar in the diet ([7]; Table  
67 S1) as the predictor variable or (b) percent of vegetative (non-fruit) plant material in the diet ([7];  
68 Table S1) as the predictor variable and loss (1) or retention (0) of *ADH7* as the dependent trait.

69 Input files and code for running these analyses in R can be found at

70 [https://github.com/MareikeJaniak/Mammal\\_ADH\\_IV](https://github.com/MareikeJaniak/Mammal_ADH_IV).

### 71 **RELAX**

72 To test for changes in selective pressure acting on *ADH7* in lineages with frugivorous or  
73 nectarivorous diets versus those without, we used the method RELAX from the HyPhy package  
74 [8]. We tested the hypotheses that (1) selection is relaxed in species that do not consume fruit  
75 and/or nectar as part of their diet and (2) selection is intensified in species in which fruit and/or  
76 nectar make up the majority (>50%) of the diet. Given a codon-based alignment and

77 phylogenetic tree, RELAX detects whether a specified subset of branches (“test branches”) is  
78 under relaxed or intensified selection compared to a specified subset of “reference branches.”  
79 For Model 1 (“Is selection on *ADH7* relaxed in species without fruit or nectar in their diet?”) we  
80 classified species with 0% fruit or nectar in their diet [7] as “test branches” and other species as  
81 “reference branches.” Internal branches were left unclassified, unless they led to two branches  
82 that were both categorized as “test” or “reference.” For Model 2 (“Is selection on *ADH7*  
83 intensified in species whose diets contain a majority of fruit and/or nectar?”) we classified  
84 species with >50% fruit or nectar in their diet as “test branches” and other species as “reference  
85 branches.” Internal branches were left unclassified unless they led to two branches that were  
86 both categorized as “test” or “reference.” The input file used for RELAX analyses can be found  
87 at [https://github.com/MareikeJaniak/Mammal ADH IV](https://github.com/MareikeJaniak/Mammal_ADH_IV).

88 **Supplemental Tables & Figures**

89 **Table S1.** Dietary information for species included in this study.

| Species                             | Diet                    | %fruit <sup>1</sup> | %nectar <sup>1</sup> | %vegetative material <sup>1</sup> | Notes                                     | Reference(s) |
|-------------------------------------|-------------------------|---------------------|----------------------|-----------------------------------|-------------------------------------------|--------------|
| <i>Canis lupus</i>                  | carnivore               | 0                   | 0                    | 0                                 |                                           | [9]          |
| <i>Equus caballus</i>               | herbivore               | 0                   | 0                    | 100                               |                                           | [10]         |
| <i>Delphinapterus leucas</i>        | carnivore               | 0                   | 0                    | 0                                 |                                           | [11]         |
| <i>Bos taurus</i>                   | herbivore               | 0                   | 0                    | 100                               |                                           | [12]         |
| <i>Capra hircus</i>                 | herbivore               | 0                   | 0                    | 100                               |                                           | [13–15]      |
| <i>Ovis aries</i>                   | herbivore               | 0                   | 0                    | 100                               |                                           | [15]         |
| <i>Pteropus vampyrus</i>            | frugivore               | 100                 | 0                    | 0                                 | Fruit, some leaves and flowers            | [16]         |
| <i>Rousettus aegyptiacus</i>        | frugivore               | 60                  | 40                   | 0                                 | Fruit, some leaves and pollen             | [17]         |
| <i>Desmodus rotundus</i>            | sanguivore              | 0                   | 0                    | 0                                 |                                           | [18]         |
| <i>Eptesicus fuscus</i>             | insectivore             | 0                   | 0                    | 0                                 |                                           | [19,20]      |
| <i>Myotis brandtii</i>              | insectivore             | 0                   | 0                    | 0                                 |                                           | [21]         |
| <i>Myotis lucifugus</i>             | insectivore             | 0                   | 0                    | 0                                 |                                           | [22]         |
| <i>Myotis davidii</i>               | insectivore             | 0                   | 0                    | 0                                 |                                           | [23]         |
| <i>Miniopterus natalensis</i>       | insectivore             | 0                   | 0                    | 0                                 |                                           | [24]         |
| <i>Rattus norvegicus</i>            | omnivore                | 20                  | 0                    | 10                                | Diet highly variable depending on habitat | [25,26]      |
| <i>Mus musculus</i>                 | omnivore                | 0                   | 0                    | 60                                | Invertebrates, seeds                      | [27–29]      |
| <i>Cricetulus griseus</i>           | omnivore                | 0                   | 0                    | 50                                | Seeds, herbs, insects                     | [30]         |
| <i>Marmota marmota</i>              | omnivore                | 30                  | 0                    | 40                                |                                           | [31]         |
| <i>Galago moholi</i>                | gummivore-insectivore   | 0                   | 60 (gum)             | 0                                 |                                           | [32,33]      |
| <i>Daubentonia madagascariensis</i> | insectivore-nectarivore | 0                   | 20                   | 0                                 |                                           | [34]         |
| <i>Microcebus murinus</i>           | frugivore-insectivore   | 30                  | 10                   | 20                                |                                           | [35,36]      |
| <i>Eulemur albifrons</i>            | omnivore                | 40                  | 0                    | 40                                |                                           | [37]         |
| <i>Saguinus oedipus</i>             | gummivore-insectivore   | 30                  | 30 (gum)             | 0                                 |                                           | [38]         |
| <i>Callithrix jacchus</i>           | gummivore-insectivore   | 30                  | 40                   | 0                                 |                                           | [39]         |
| <i>Saimiri sciureus</i>             | insectivore-frugivore   | 20                  | 0                    | 20                                |                                           | [40,41]      |
| <i>Sapajus apella</i>               | omnivore                | 20                  | 10                   | 20                                |                                           | [42,43]      |
| <i>Papio anubis</i>                 | omnivore                | 20                  | 0                    | 30                                |                                           | [44]         |
| <i>Chlorocebus aethiops</i>         | omnivore                | 40                  | 0                    | 20                                |                                           | [45]         |
| <i>Hylobates moloch</i>             | frugivore               | 70                  | 0                    | 20                                |                                           | [46]         |
| <i>Pongo abelii</i>                 | frugivore               | 80                  | 0                    | 0                                 |                                           | [47,48]      |
| <i>Gorilla gorilla</i>              | herbivore-frugivore     | 10                  | 0                    | 90                                |                                           | [49]         |
| <i>Pan troglodytes</i>              | frugivore               | 60                  | 0                    | 30                                |                                           | [50]         |

|                            |                         |    |         |     |                                       |         |
|----------------------------|-------------------------|----|---------|-----|---------------------------------------|---------|
| Homo sapiens               | omnivore                | 60 | 0       | 30  | Diet varies with population, location |         |
| Tupaia chinensis           | insectivore-frugivore   | 0  | 0 (*10) | 10  | Evidence of frugivory                 | [51–53] |
| Loxodonta africana         | herbivore               | 0  | 0       | 100 |                                       | [54,55] |
| Elephas maximus            | herbivore               | 0  | 0       | 100 |                                       | [56,57] |
| Mammuthus primigenius      | herbivore               | 0  | 0       | 100 |                                       | [58,59] |
| Elephantulus edwardii      | insectivore-nectarivore | 0  | 0 (*10) | 0   | Recently observed to feed on nectar   | [60,61] |
| Balaenoptera acutorostrata | carnivore               | 0  | 0       | 0   |                                       | [62]    |
| Bos mutus                  | herbivore               | 0  | 0       | 100 |                                       | [63]    |
| Carlito syrichta           | insectivore             | 0  | 0       | 0   |                                       | [64]    |
| Castor canadensis          | herbivore               | 0  | 0       | 100 |                                       | [65]    |
| Cavia porcellus            | herbivore               | 0  | 0       | 100 |                                       | [66,67] |
| Ceratotherium simum        | herbivore               | 0  | 0       | 100 |                                       | [68]    |
| Chinchilla lanigera        | herbivore               | 0  | 0       | 100 |                                       | [69]    |
| Choloepus hoffmanni        | folivore-frugivore      | 30 | 0       | 70  |                                       | [70,71] |
| Dasypus novemcinctus       | insectivore             | 0  | 0       | 0   |                                       | [72,73] |
| Dipodomys ordii            | omnivore                | 20 | 0       | 30  | Seeds, insects, grasses               | [74,75] |
| Eonycteris spelaea         | nectarivore             | 0  | 100     | 0   |                                       | [76,77] |
| Erinaceus europaeus        | insectivore             | 0  | 0       | 0   |                                       | [78]    |
| Galeopterus variegatus     | folivore                | 0  | 0       | 100 | Occasional fruit and insects          | [79]    |
| Ictidomys tridecemlineatus | omnivore                | 0  | 0       | 40  | Insects, seeds, grass                 | [80]    |
| Manis pentadactyla         | insectivore             | 0  | 0       | 0   |                                       | [81]    |
| Marmota flaviventris       | herbivore-omnivore      | 30 | 0       | 40  | Grasses, forbs, seeds                 | [82,83] |
| Mastomys coucha            | omnivore                | 0  | 0       | 30  |                                       | [84]    |
| Meriones unguiculatus      | granivore               | 10 | 0       | 50  | Seeds                                 | [85]    |
| Microtus ochrogaster       | herbivore               | 0  | 0       | 80  |                                       | [86]    |
| Monodon monoceros          | carnivore               | 0  | 0       | 0   |                                       | [87,88] |
| Mus caroli                 | omnivore                | 0  | 0       | 60  | Invertebrates, seeds                  | [89]    |
| Mus pahari                 | omnivore                | 0  | 0       | 60  | Data from wild not available          |         |
| Neophocaena phocaenoides   | carnivore               | 0  | 0       | 0   |                                       | [90]    |
| Octodon degus              | herbivore               | 20 | 0       | 60  |                                       | [91]    |
| Odobenus rosmarus          | carnivore               | 0  | 0       | 0   |                                       | [92]    |
| Orcinus orca               | carnivore               | 0  | 0       | 0   |                                       | [93,94] |
| Orycteropus afer           | insectivore             | 0  | 0       | 0   |                                       | [95]    |
| Oryctolagus cuniculus      | herbivore               | 0  | 0       | 100 |                                       | [96]    |
| Peromyscus leucopus        | omnivore                | 20 | 0       | 0   | Invertebrates, fruit, seeds           | [97]    |
| Peromyscus maniculatus     | omnivore                | 20 | 0       | 0   | Invertebrates, fruit, seeds           | [97]    |
| Phascolarctos              | folivore                | 0  | 0       | 100 | Specialized on eucalyptus             | [98]    |

|                           |             |         |    |     |                                     |
|---------------------------|-------------|---------|----|-----|-------------------------------------|
| cinereus                  |             |         |    |     |                                     |
| Phyllostomus discolor     | omnivore    | 40      | 30 | 0   | [99]                                |
| Physeter catodon          | carnivore   | 0       | 0  | 0   | [100]                               |
| Ptilocolobus tephrosceles | folivore    | 20      | 0  | 80  | [101,102]                           |
| Ornithorhynchus anatinus  | carnivore   | 0       | 0  | 0   | [103]                               |
| Procyon lotor             | herbivore   | 0       | 0  | 100 | [104]                               |
| Rhinolophus sinicus       | insectivore | 0       | 0  | 10  | [105]                               |
| Rhinopithecus roxellana   | folivore    | 10      | 0  | 80  | [106,107]                           |
| Sarcophilus harrisii      | carnivore   | 0       | 0  | 0   | [108,109]                           |
| Sorex araneus             | insectivore | 0       | 0  | 0   | [110,111]                           |
| Sus scrofa                | omnivore    | 0 (*10) | 0  | 60  | Diet variable, includes fruit [112] |
| Trichechus manatus        | herbivore   | 0       | 0  | 100 | [113]                               |
| Tursiops truncatus        | carnivore   | 0       | 0  | 0   | [114]                               |
| Urocyon v. parryi         | herbivore   | 0       | 0  | 40  | [115]                               |
| Vulpes vulpes             | carnivore   | 10      | 0  | 0   | Occasional fruit [116]              |
| Zalophus californianus    | carnivore   | 0       | 0  | 0   | [117]                               |

90

91 Notes for diet table:

92 **1** From EltonTraits 1.0 [7]. \*For some species, frugivory and/or nectarivory has been reported in  
 93 the literature, but was listed as 0% in EltonTraits. For these species we used a conservative  
 94 estimate of 10% fruit/nectar in the linear model.

95

96

97

98 **Table S2.** Calculations for dating pseudogenization events

| Clade (branch on which gene was inactivated) | substitution model | $\omega$ mixed | $\omega$ functional | $\omega$ pseudo-gene | Mixed branch length (Ma) | Time pseudogenetic (Ma) | Mean time pseudogenetic (Ma) | Inactivation date (MYA) |
|----------------------------------------------|--------------------|----------------|---------------------|----------------------|--------------------------|-------------------------|------------------------------|-------------------------|
| <b>Bovidae</b>                               | F1X4               | 0.56399        | 0.12664             | 0.99106              |                          | 15.86639799             |                              |                         |
|                                              | F3X4               | 0.59723        | 0.13005             | 1.05366              | 31.3598531               |                         | 15.86242697                  | 40.46441248             |
| <b>Elephantidae</b>                          | F1X4               | 0.56399        | 0.12664             | 0.99106              |                          | 29.04330581             |                              |                         |
|                                              | F3X4               | 0.59723        | 0.13005             | 1.05366              | 57.40394286              |                         | 29.03603688                  | 54.92467135             |
| <b>Cetacea</b>                               | F1X4               | 0.56399        | 0.12664             | 0.99106              |                          | 11.36347696             |                              |                         |
|                                              | F3X4               | 0.59723        | 0.13005             | 1.05366              | 22.4598531               |                         | 11.36205494                  | 44.86205494             |
| <b>Equus</b>                                 | F1X4               | 0.56399        | 0.12664             | 0.99106              |                          | 27.52384124             |                              |                         |
|                                              | F3X4               | 0.59723        | 0.13005             | 1.05366              | 54.40072903              |                         | 27.5169526                   | 27.52039692             |
| <b>Castor</b>                                | F1X4               | 0.56399        | 0.12664             | 0.99106              |                          | 32.0033248              |                              |                         |
|                                              | F3X4               | 0.59723        | 0.13005             | 1.05366              | 63.254405                |                         | 31.99531504                  | 31.99931992             |
| <b>Octodon</b>                               | F1X4               | 0.56399        | 0.12664             | 0.99106              |                          | 16.62304636             |                              |                         |
|                                              | F3X4               | 0.59723        | 0.13005             | 1.05366              | 32.85536467              |                         | 16.61888597                  | 16.62096616             |
| <b>Cavia</b>                                 | F1X4               | 0.56399        | 0.12664             | 0.99106              |                          | 18.10224825             |                              |                         |
|                                              | F3X4               | 0.59723        | 0.13005             | 1.05366              | 35.7789995               |                         | 18.09771764                  | 18.09998294             |
| <b>Ceratotherium</b>                         | F1X4               | 0.56399        | 0.12664             | 0.99106              |                          | 27.52384124             |                              |                         |
|                                              | F3X4               | 0.59723        | 0.13005             | 1.05366              | 54.40072903              |                         | 27.5169526                   | 27.52039692             |
| <b>Dasybus</b>                               | F1X4               | 0.56399        | 0.12664             | 0.99106              |                          | 50.85081095             |                              |                         |
|                                              | F3X4               | 0.59723        | 0.13005             | 1.05366              | 100.5063633              |                         | 50.83808406                  | 50.84444751             |
| <b>Carnivora</b>                             | F1X4               | 0.56399        | 0.12664             | 0.99106              |                          | 29.22191901             |                              |                         |
|                                              | F3X4               | 0.59723        | 0.13005             | 1.05366              | 57.75697092              |                         | 29.2182622                   | 48.68788528             |

99

100 Notes for table: Omega values (dN/dS ratios) were calculated with codeml in PAML and  
 101 calculations were based on [3]. Branches on which pseudogenising mutations occurred were  
 102 classified as “mixed,” branches that post-date pseudogenisation as “pseudogene,” and  
 103 branches without premature stop codons as “functional.” Some species were excluded from the



104 alignment because only a small part of the sequence aligned cleanly to the other sequences.  
105 The amount of time that a branch has been pseudogenetic ( $T_p$ ) is calculated by subtracting the  
106 amount of time that the branch is inferred to have been under purifying selection ( $T_f$ ), which is  
107 determined by the following formula:

$$108 \quad T_f = T - \left( \frac{T \times (\omega_m - \omega_p)}{(\omega_f - \omega_p)} \right)$$

109 Where T is the length of the mixed branch,  $\omega_m$  is the dN/dS ratio of the mixed branch,  $\omega_p$  is the  
110 dN/dS ratio of pseudogenised branches, and  $\omega_f$  is the dN/dS ratio of functional branches.

111 Because the two different substitution models used to calculate dN/dS ratios resulted in slightly  
112 different estimates of  $T_p$ , we used the mean of the two numbers to determine gene inactivation  
113 dates. If pseudogenisation occurred on a terminal branch (*Equus*, *Delphinapterus*)  $T_p$  is equal to  
114 the inactivation date in millions of years ago. If gene loss occurred on an internal branch  
115 (Bovidae, Elephantidae), the length of branches leading to the tip was added to arrive at the  
116 inactivation date. All branch lengths were from TimeTree [4].

117

118

119 **Table S3.** Results of phylogenetic logistic regression analyses.

| <b>Hypothesis</b>                                                     | <b>Method</b><br>(phyloglm<br>function in R) | <b><math>\alpha</math></b><br>(strength of<br>phylogenetic<br>signal) | <b>Intercept</b> | <b>Slope</b> | <b><i>p</i></b> |
|-----------------------------------------------------------------------|----------------------------------------------|-----------------------------------------------------------------------|------------------|--------------|-----------------|
| <i>ADH7</i> loss<br>predicted by<br>herbivory                         | logistic_MPLe                                | 0.006305245                                                           | -1.35102583      | 0.00030788   | 0.9603          |
|                                                                       | logistic_IG10                                | 0.003992322                                                           | -1.3510919       | 0.0141951    | 0.04379         |
| <i>ADH7</i><br>retention<br>predicted by<br>frugivory/<br>nectarivory | logistic_MPLe                                | 0.006327771                                                           | -0.07124251      | -0.00058409  | 0.9329          |
|                                                                       | logistic_IG10                                | 0.002991951                                                           | -0.8292794       | 0.000000     | 1.000000        |

120

121  
122

**Table S4.** Results of the RELAX analyses of relaxed/intensified selection.

| Hypothesis                                  | Model                                            | logL                   | # of parameters  | AIC <sub>c</sub> | Branch Set | (percent of sites) |                  |                          |               |
|---------------------------------------------|--------------------------------------------------|------------------------|------------------|------------------|------------|--------------------|------------------|--------------------------|---------------|
|                                             |                                                  |                        |                  |                  |            | $\omega_1$         | $\omega_2$       | $\omega_3$               |               |
| No fruit/nectar -<br>> relaxed<br>selection | General<br>descriptive                           | -13114.3               | 305              | 26849.6          | Shared     | 0.00<br>(70.56%)   | 0.81<br>(29.44%) | 1.00 (0.00%)             |               |
|                                             |                                                  |                        |                  |                  | Reference  | 0.00<br>(81.83%)   | 0.95<br>(18.14%) | 9999843742.81<br>(0.02%) |               |
|                                             | Alternative                                      | -13371.5               | 168              | 27082.2          | Test       | 0.12<br>(81.83%)   | 0.99<br>(18.14%) | 381.31 (0.02%)           |               |
|                                             |                                                  |                        |                  |                  | Null       | -13393.0           | 167              | 27123.3                  | Reference     |
|                                             | Partitioned<br>descriptive                       | -13361.8               | 172              | 27071.0          | Test       | 0.01<br>(75.98%)   | 1.00<br>(24.00%) | 219.85 (0.02%)           |               |
|                                             |                                                  |                        |                  |                  | Reference  | 0.00<br>(85.03%)   | 1.00<br>(13.77%) | 2.86 (1.20%)             |               |
|                                             | High fruit/nectar<br>-> intensified<br>selection | General<br>descriptive | -13116.0         | 305              | 26852.8    | Shared             | 0.00<br>(64.67%) | 0.19<br>(30.25%)         | 1.08 (5.07%)  |
|                                             |                                                  |                        |                  |                  |            | Reference          | 0.07<br>(53.89%) | 0.17<br>(34.70%)         | 1.44 (11.41%) |
| Alternative                                 |                                                  | -13374.4               | 168              | 27088.1          | Test       | 0.00<br>(53.89%)   | 0.00<br>(34.70%) | 3.20 (11.41%)            |               |
|                                             |                                                  |                        |                  |                  | Null       | -13377.0           | 167              | 27091.2                  | Reference     |
| Partitioned<br>descriptive                  |                                                  | -13373.6               | 172              | 27094.6          | Test       | 0.00<br>(21.69%)   | 0.21<br>(73.74%) | 2.77 (4.57%)             |               |
|                                             |                                                  |                        |                  |                  | Reference  | 0.00<br>(32.07%)   | 0.25<br>(63.41%) | 2.46 (4.52%)             |               |
| Test                                        |                                                  | 0.00<br>(58.59%)       | 0.00<br>(29.15%) | 2.96 (12.27%)    |            |                    |                  |                          |               |

123

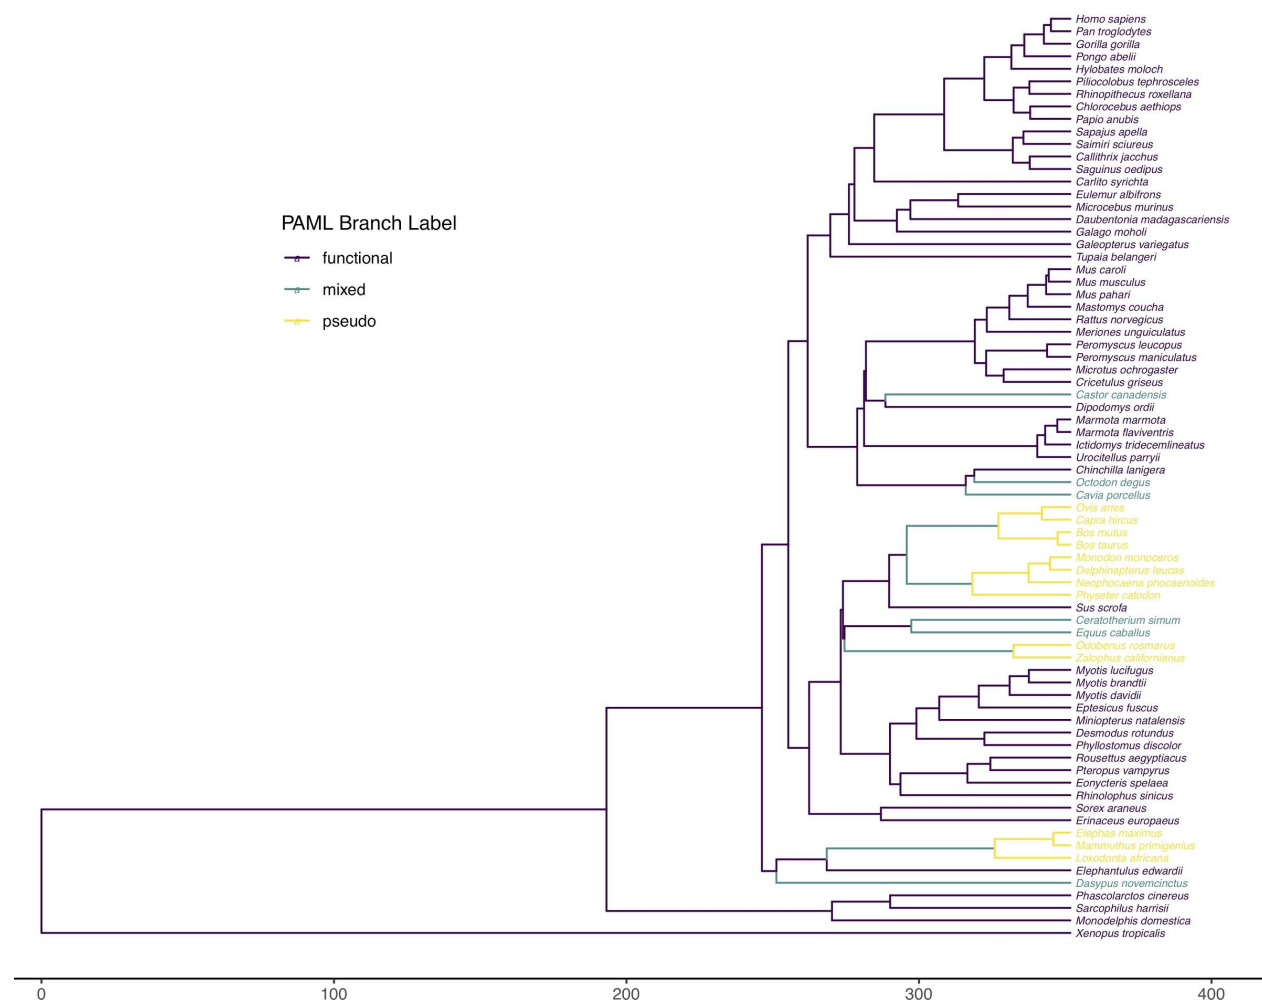

124  
125 **Figure S5.** Phylogeny and branch classifications used in PAML analyses for timing of  
126 pseudogenisations.

127 References for Supplemental Materials

- 128 1. Palkopoulou E *et al.* 2018 A comprehensive genomic history of extinct and living elephants.  
129 *Proc. Natl. Acad. Sci. U. S. A.* **115**, E2566–E2574.
- 130 2. Goodhead I, Darby AC. 2015 Taking the pseudo out of pseudogenes. *Curr. Opin. Microbiol.*  
131 **23**, 102–109.
- 132 3. Meredith RW, Gatesy J, Murphy WJ, Ryder OA, Springer MS. 2009 Molecular decay of the  
133 tooth gene Enamelin (ENAM) mirrors the loss of enamel in the fossil record of placental  
134 mammals. *PLoS Genet.* **5**, e1000634.
- 135 4. Kumar S, Stecher G, Suleski M, Hedges SB. 2017 TimeTree: A Resource for Timelines,  
136 Timetrees, and Divergence Times. *Mol. Biol. Evol.* **34**, 1812–1819.
- 137 5. Ho L si T, Ané C. 2014 A linear-time algorithm for Gaussian and non-Gaussian trait  
138 evolution models. *Syst. Biol.* **63**, 397–408.
- 139 6. Jiao H, Zhang L, Xie H-W, Simmons NB, Liu H, Zhao H. 2019 Trehalase Gene as a  
140 Molecular Signature of Dietary Diversification in Mammals. *Mol. Biol. Evol.* **36**, 2171–2183.
- 141 7. Wilman H, Belmaker J, Simpson J, de la Rosa C, Rivadeneira MM, Jetz W. 2014  
142 EltonTraits 1.0: Species-level foraging attributes of the world’s birds and mammals:  
143 Ecological Archives E095-178. *Ecology* **95**, 2027–2027.
- 144 8. Wertheim JO, Murrell B, Smith MD, Kosakovsky Pond SL, Scheffler K. 2015 RELAX:  
145 detecting relaxed selection in a phylogenetic framework. *Mol. Biol. Evol.* **32**, 820–832.
- 146 9. Ciucci P, Boitani L, Pelliccioni ER, Rocco M, Guy I. 1996 A comparison of scat-analysis  
147 methods to assess the diet of the wolf *Canis lupus*. *Wildlife Biol.* **2**, 37–48.
- 148 10. Crane KK, Smith MA, Reynolds D. 1997 Habitat Selection Patterns of Feral Horses in  
149 Southcentral Wyoming. *J. Range Manage.* **50**, 374–380.
- 150 11. Quakenbush LT, Suydam RS, Brown AL, Lowry LF, Frost KJ, Mahoney BA. 2015 Diet of  
151 beluga whales, *Delphinapterus leucas*, in Alaska from stomach contents, March–November.  
152 *Marine Fisheries Review* **77**, 70–84.
- 153 12. Ngugi KR, Powell J, Hinds FC, Olson RA. 1992 Range animal diet composition in  
154 southcentral Wyoming. *J. Range Manage.* , 542–545.
- 155 13. Mitchell RJ, Fordham RA, John A. 1987 The annual diet of feral goats (*Capra hircus* L.) in  
156 lowland rimu-rata-kamahi forest on eastern Mount Taranaki (Mt Egmont). *N. Z. J. Zool.* **14**,  
157 179–192.
- 158 14. Mysterud A. 2000 Diet overlap among ruminants in Fennoscandia. *Oecologia* **124**, 130–  
159 137.
- 160 15. Garcia-Gonzalez R, Cuartas P. 1989 A comparison of the diets of the wild goat (*Capra*  
161 *pyrenaica*), domestic goat (*Capra hircus*), moufflon (*Ovis musimon*), and domestic sheep  
162 (*Ovis aries*) in the Cazorla mountain range. *Acta Biologica Montana* **9**, 123–132.
- 163 16. Stier SC, Mildenstein TL. 2005 Dietary Habits of the World’s Largest Bats: the Philippine

- 164 Flying Foxes, *Acerodon Jubatus* and *Pteropus Vampyrus Lanensis*. *J. Mammal.* **86**, 719–  
165 728.
- 166 17. Korine C, Izhaki I, Arad Z. 1999 Is the Egyptian fruit-bat *Rousettus aegyptiacus* a pest in  
167 Israel? An analysis of the bat’s diet and implications for its conservation. *Biol. Conserv.* **88**,  
168 301–306.
- 169 18. Greenhall AM. 1988 Feeding behavior. *Natural history of vampire bats* , 111–131.
- 170 19. Hamilton IM, Barclay RMR. 1998 Diets of Juvenile, Yearling, and Adult Big Brown Bats  
171 (*Eptesicus fuscus*) in Southeastern Alberta. *J. Mammal.* **79**, 764–771.
- 172 20. Agosta SJ. 2002 Habitat use, diet and roost selection by the Big Brown Bat (*Eptesicus*  
173 *fuscus*) in North America: a case for conserving an abundant species. *Mamm. Rev.* **32**,  
174 179–198.
- 175 21. Vaughan N. 1997 The diets of British bats (Chiroptera). *Mamm. Rev.* **27**, 77–94.
- 176 22. Belwood JJ, Fenton MB. 1976 Variation in the diet of *Myotis lucifugus* (Chiroptera:  
177 *Vespertilionidae*). *Can. J. Zool.* **54**, 1674–1678.
- 178 23. Benda P, Faizolâhi K, Andreas M, Obuch J, Reiter A, Ševčík M, Uhrin M, Vallo P, Ashrafi S.  
179 2012 Bats (Mammalia: Chiroptera) of the Eastern Mediterranean and Middle East. Part 10.  
180 Bat fauna of Iran. *Acta Societatis Zoologicae Bohemicae* **76**, 163–582.
- 181 24. Moyo S, Jacobs DS. 2020 Faecal analyses and alimentary tracers reveal the foraging  
182 ecology of two sympatric bats. *PLoS One* **15**, e0227743.
- 183 25. Major HL, Jones IL, Charette MR, Diamond AW. 2007 Variations in the diet of introduced  
184 Norway rats (*Rattus norvegicus*) inferred using stable isotope analysis. *J. Zool.* **271**, 463–  
185 468.
- 186 26. Ofusori DA, Caxton-Martins EA. 2008 A comparative histomorphometric study of the  
187 stomach of rat (*Rattus norvegicus*), bat (*Eidolon helvum*) and pangolin (*Manis tricuspis*) in  
188 relation to diet. *Int. J. Morphol.* **26**, 669–674.
- 189 27. Cockburn A. 1980 The diet of the new holland mouse (*Pseudomys novaehollandiae*) and the  
190 house mouse (*Mus musculus*) in a Victorian coastal heathland. *Aust. Mammal.* **3**, 31–34.
- 191 28. Badan D. 1986 Diet of the house mouse (*Mus musculus*) in two pine and a kauri forest. *N.*  
192 *Z. J. Ecol.* **9**, 137–141.
- 193 29. Le Roux V, Chapuis J-L, Frenot Y, Vernon P. 2002 Diet of the house mouse (*Mus*  
194 *musculus*) on Guillou Island, Kerguelen archipelago, Subantarctic. *Polar Biol.* **25**, 49–57.
- 195 30. Zhen P, Yong W, ZunLong F, YaHeng L, YunHu X, Bing H, YuMei W, JingRui Z. 2014  
196 Food consumption of striped hamster (*Cricetulus barabensis*) and its dynamic changes in  
197 Hunshandake sandy land of Inner Mongolia, China. *Zhongguo Meijie Shengwuxue ji*  
198 *Kongzhi Zazhi = Chinese Journal of Vector Biology and Control* **25**, 408–412.
- 199 31. Garin I, Aldezabal A, Herrero J, Garcia-Serrano A, Remon JL. 2008 Diet selection of the  
200 alpine Marmot (*Marmota m. marmota* L.) in the Pyrénées. *Revue d’écologie*

- 201 32. Harcourt C. 1986 Seasonal variation in the diet of South African galagos. *Int. J. Primatol.* **7**,  
202 491–506.
- 203 33. Nowack J, Wippich M, Mzilikazi N, Dausmann KH. 2013 Surviving the cold, dry period in  
204 Africa: behavioral adjustments as an alternative to heterothermy in the African lesser  
205 bushbaby (*Galago moholi*). *Int. J. Primatol.* **34**, 49–64.
- 206 34. Sterling EJ, Dierenfeld ES, Ashbourne CJ, Feistner AT. 1994 Dietary intake, food  
207 composition and nutrient intake in wild and captive populations of *Daubentonia*  
208 *madagascariensis*. *Folia Primatol.* **62**, 115–124.
- 209 35. Lahann P. 2007 Feeding ecology and seed dispersal of sympatric cheirogaleid lemurs  
210 (*Microcebus murinus*, *Cheirogaleus medius*, *Cheirogaleus major*) in the littoral rainforest of  
211 south-east Madagascar. *J. Zool.* **271**, 88–98.
- 212 36. Thorén S, Quietzsch F, Schwochow D, Sehen L, Meusel C, Meares K, Radespiel U. 2011  
213 Seasonal changes in feeding ecology and activity patterns of two sympatric mouse lemur  
214 species, the gray mouse lemur (*Microcebus murinus*) and the golden-brown mouse lemur  
215 (*M. ravelobensis*), in northwestern Madagascar. *Int. J. Primatol.* **32**, 566–586.
- 216 37. Vasey N. 2000 Niche separation in *Varecia variegata rubra* and *Eulemur fulvus albifrons*: I.  
217 Interspecific patterns. *International Journal of Physical Anthropology* **112**, 411–431.
- 218 38. Garber PA. 1984 Proposed nutritional importance of plant exudates in the diet of the  
219 Panamanian Tamarin, *Saguinus oedipus geoffroyi*. *Int. J. Primatol.*
- 220 39. Alonso C, Langguth A. 1989 Ecologia e comportamento de *Callithrix jacchus* (Primates:  
221 Callitrichidae) numa ilha de floresta Atlântica. *Rev. Nordestina Biol.* **6**, 105–137.
- 222 40. Rosenberger AL. 1992 Evolution of feeding niches in New World monkeys. *Am. J. Phys.*  
223 *Anthropol.* **88**, 525–562.
- 224 41. Lima EM, Ferrari SF. 2003 Diet of a Free-Ranging Group of Squirrel Monkeys (*Saimiri*  
225 *sciureus*) in Eastern Brazilian Amazonia. *Folia Primatol.* **74**, 150–158.
- 226 42. Galetti M, Pedroni F. 1994 Seasonal diet of capuchin monkeys (*Cebus apella*) in a  
227 semideciduous forest in south-east Brazil. *J. Trop. Ecol.* **10**, 27–39.
- 228 43. Brown AD, Zunino GE. 1990 Dietary variability in *Cebus apella* in extreme habitats:  
229 Evidence for adaptability. *Folia Primatol.* **54**, 187–195.
- 230 44. Okecha AA, Newton-Fisher NE. 2006 The Diet of Olive Baboons (*Papio anubis*) in the  
231 Budongo Forest Reserve, Uganda. In *Primates of Western Uganda*, pp. 61–73. New York,  
232 NY: Springer, New York, NY.
- 233 45. Whitten PL. 1982 Diet and dominance among female vervet monkeys (*Cercopithecus*  
234 *aethiops*). *Am. J. Primatol.* **5**, 139–159.
- 235 46. Kim S, Lappan S, Choe JC. 2011 Diet and ranging behavior of the endangered Javan  
236 gibbon (*Hylobates moloch*) in a submontane tropical rainforest. *Am. J. Primatol.* **73**, 270–  
237 280.
- 238 47. Hardus ME, de Vries H, Dellatore DF, Lameira AR, Menken SBJ, Wich SA. 2013

- 239 Socioecological correlates of inter-individual variation in orangutan diets at Ketambe,  
240 Sumatra. *Behav. Ecol. Sociobiol.* **67**, 429–437.
- 241 48. Wich SA, Utami-Atmoko SS, Setia TM, Djoyosudharmo S, Geurts ML. 2006 Dietary and  
242 Energetic Responses of *Pongo abelii* to Fruit Availability Fluctuations. *Int. J. Primatol.* **27**,  
243 1535–1550.
- 244 49. Doran-Sheehy D, Mongo P, Lodwick J, Conklin-Brittain NL. 2009 Male and female western  
245 gorilla diet: Preferred foods, use of fallback resources, and implications for ape versus old  
246 world monkey foraging strategies. *Am. J. Phys. Anthropol.* **140**, 727–738.
- 247 50. Hohmann G, Potts K, N’Guessan A, Fowler A, Mundry R, Ganzhorn JU, Ortmann S. 2010  
248 Plant foods consumed by Pan: exploring the variation of nutritional ecology across Africa.  
249 *Am. J. Phys. Anthropol.* **141**, 476–485.
- 250 51. Corlett RT. 1998 Frugivory and seed dispersal by vertebrates in the Oriental (Indomalayan)  
251 Region. *Biol. Rev. Camb. Philos. Soc.* **73**, 413–448.
- 252 52. Emmons LH. 1991 Frugivory in Treeshrews (*Tupaia*). *Am. Nat.* **138**, 642–649.
- 253 53. Suzuki S et al. 2007 Fruit visitation patterns of small mammals on the forest floor in a  
254 tropical seasonal forest of Thailand. *Tropics* **16**, 17–29.
- 255 54. Sikes SK. 1971 *Natural history of the African elephant*. London: Weidenfeld & Nicolson.
- 256 55. Sukumar R, Professor Centre for Ecological Sciences and Divecha Centre for Climate  
257 Change Raman Sukumar, Wilce. 2003 *The Living Elephants: Evolutionary Ecology,*  
258 *Behaviour, and Conservation*. Oxford University Press, USA.
- 259 56. Sukumar R. 1990 Ecology of the Asian elephant in southern India. II. Feeding habits and  
260 crop raiding patterns. *J. Trop. Ecol.* **6**, 33–53.
- 261 57. Chen J, Deng X, Zhang L, Bai Z. 2006 Diet composition and foraging ecology of Asian  
262 elephants in Shangyong, Xishuangbanna, China. *Acta Ecol. Sin.* **26**, 309–316.
- 263 58. Tütken T, Furrer H, Walter Vennemann T. 2007 Stable isotope compositions of mammoth  
264 teeth from Niederweningen, Switzerland: Implications for the Late Pleistocene climate,  
265 environment, and diet. *Quat. Int.* **164-165**, 139–150.
- 266 59. Rivals F, Semperebon G, Lister A. 2012 An examination of dietary diversity patterns in  
267 Pleistocene proboscideans (*Mammuthus*, *Palaeoloxodon*, and *Mammut*) from Europe and  
268 North America as revealed by dental microwear. *Quat. Int.* **255**, 188–195.
- 269 60. Wester P. 2011 Nectar feeding by the Cape rock elephant-shrew *Elephantulus edwardii*  
270 (*Macroscelidea*) — A primarily insectivorous mammal pollinates the parasite *Hyobanche*  
271 *atropurpurea* (*Orobanchaceae*). *Flora - Morphology, Distribution, Functional Ecology of*  
272 *Plants* **206**, 997–1001.
- 273 61. Wester P. 2015 The forgotten pollinators—First field evidence for nectar-feeding by primarily  
274 insectivorous elephant-shrews. *Journal of Pollination Ecology* **16**.
- 275 62. Tamura T, Fujise Y, Shimazaki K. 1998 Diet of minke whales *Balaenoptera acutorostrata* in  
276 the northwestern part of the North Pacific in summer, 1994 and 1995. *Fish. Sci.* **64**, 71–76.



- 277 63. Harris RB, Miller DJ. 1995 Overlap in summer habitats and diets of Tibetan Plateau  
278 ungulates. *Mammalia*
- 279 64. Patricia C. Wright, Elwyn L. Simons, Sharon Gursky. 2003 *Tarsiers Past, Present, and*  
280 *Future*. New Brunswick, NJ: Rutgers University Press.
- 281 65. Severud WJ, Windels SK, Belant JL, Bruggink JG. 2013 The role of forage availability on  
282 diet choice and body condition in American beavers (*Castor canadensis*). *Mamm. Biol.* **78**,  
283 87–93.
- 284 66. National Research Council (US) Subcommittee on Laboratory Animal Nutrition. 1995  
285 *Nutrient Requirements of the Guinea Pig*. National Academies Press (US).
- 286 67. Wagner JE. 2014 *The Biology of the Guinea Pig*. Academic Press.
- 287 68. Steuer P et al. 2010 Comparative investigations on digestion in grazing (*Ceratotherium*  
288 *simum*) and browsing (*Diceros bicornis*) rhinoceroses. *Comp. Biochem. Physiol. A Mol.*  
289 *Integr. Physiol.* **156**, 380–388.
- 290 69. Cortés A, Miranda E, Jiménez JE. 2002 Seasonal food habits of the endangered long-tailed  
291 chinchilla (*Chinchilla lanigera*): the effect of precipitation. *Mamm. Biol.* **67**, 167–175.
- 292 70. Vaughan C, Ramírez O, Herrera G, Guries R. 2007 Spatial ecology and conservation of  
293 two sloth species in a cacao landscape in limón, Costa Rica. *Biodivers. Conserv.* **16**, 2293–  
294 2310.
- 295 71. Hayssen V. 2011 *Choloepus hoffmanni* (Pilosa: Megalonychidae). *Mammalian Species* **43**,  
296 37–55.
- 297 72. Sikes RS, Heidt GA, Elrod DA. 1990 Seasonal Diets of the Nine-banded Armadillo  
298 (*Dasyus novemcinctus*) in a Northern Part of Its Range. *Am. Midl. Nat.* **123**, 383–389.
- 299 73. Redford KH. 1986 Dietary specialization and variation in two mammalian myrmecophages  
300 (variation in mammalian myrmecophagy). *Revista Chilena de Historia Natural* **59**, 201–208.
- 301 74. Alcoze TM, Zimmerman EG. 1973 Food Habits and Dietary Overlap of Two Heteromyid  
302 Rodents from the Mesquite Plains of Texas. *J. Mammal.* **54**, 900–908.
- 303 75. Henderson CB. 1990 The influence of seed apparency, nutrient content and chemical  
304 defenses on dietary preference in *Dipodomys ordii*. *Oecologia* **82**, 333–341.
- 305 76. Gould E. 1978 Foraging Behavior of Malaysian Nectar-Feeding Bats. *Biotropica* **10**, 184–  
306 193.
- 307 77. Sara Bumrungsri, Duncan Lang, Colin Harrower, Ekapong Sripaoraya, Kitika Kitpipit, Paul  
308 A. Racey. 2013 The dawn bat, *Eonycteris spelaea* Dobson (Chiroptera: Pteropodidae)  
309 feeds mainly on pollen of economically important food plants in Thailand. *Acta Chiropt.* **15**,  
310 95–104.
- 311 78. Dickman CR. 1988 Age-related dietary change in the European hedgehog, *Erinaceus*  
312 *europaeus*. *J. Zool.* **215**, 1–14.
- 313 79. Dzulhelmi MN, Abdullah MT, Others. 2009 Foraging ecology of the Sunda colugo

- 314 (Galeopterus variegatus) in Bako National Park, Sarawak, Malaysia. *Malay. Nat. J.* **61**,  
315 285–294.
- 316 80. Streubel DP, Fitzgerald JP. 1978 *Spermophilus tridecemlineatus*. *Mammalian Species*, 1–  
317 5.
- 318 81. Wu S, Liu N, Li Y, Sun R. 2005 Observation on food habits and foraging behavior of  
319 chinese pangolin (*Manis pentadactyla*). *Chinese Journal of Applied and Environmental*  
320 *Biology* **11**, 337.
- 321 82. Frase BA, Armitage KB. 1989 Yellow-bellied marmots are generalist herbivores. *Ethol.*  
322 *Ecol. Evol.* **1**, 353–366.
- 323 83. Stallman EL, Holmes WG. 2002 Selective Foraging and Food Distribution of High-Elevation  
324 Yellow-Bellied Marmots (*Marmota flaviventris*). *J. Mammal.* **83**, 576–584.
- 325 84. Mulungu LS et al. 2011 Dietary differences of the multimammate mouse, *Mastomys*  
326 *natalensis* (Smith, 1834), across different habitats and seasons in Tanzania and Swaziland.  
327 *Wildl. Res.* **38**, 640–646.
- 328 85. Zhang X, Liu X, Wang D. 2012 Seasonal Changes in Body Mass and Energy Balance in  
329 Wild Small Mammals. In *Comparative Physiology of Fasting, Starvation, and Food*  
330 *Limitation* (ed MD McCue), pp. 207–216. Berlin, Heidelberg: Springer Berlin Heidelberg.
- 331 86. Haken AE, Batzli GO. 1996 Effects of Availability of Food and Interspecific Competition on  
332 Diets of Prairie Voles (*Microtus ochrogaster*). *J. Mammal.* **77**, 315–324.
- 333 87. Finley KJ, Gibb EJ. 1982 Summer diet of the narwhal (*Monodon monoceros*) in Pond Inlet,  
334 northern Baffin Island. *Can. J. Zool.* **60**, 3353–3363.
- 335 88. Matley JK, Fisk AT, Dick TA. 2015 Foraging ecology of ringed seals (*Pusa hispida*), beluga  
336 whales (*Delphinapterus leucas*) and narwhals (*Monodon monoceros*) in the Canadian High  
337 Arctic determined by stomach content and stable isotope analysis. *Polar Res.* **34**, 24295.
- 338 89. Lee C-W, Kao W-Y, Kao S-J, Lin Y-TK. 2007 PS 21-7: Seasonal dietary changes of  
339 Formosan mouse (*Mus caroli*) revealed by stable carbon and nitrogen isotopes.  
340 eco.confex.com.
- 341 90. Lu Z, Xu S, Song N, Gao T, Tian J, Han J. 2016 Analysis of the diet of finless porpoise  
342 (*Neophocaena asiaeorientalis sunameri*) based on prey morphological characters and DNA  
343 barcoding. *Conserv. Genet. Resour.* **8**, 523–531.
- 344 91. Bozinovic F, Bacigalupe LD, Vásquez RA, Visser GH, Veloso C, Kenagy GJ. 2004 Cost of  
345 living in free-ranging degus (*Octodon degus*): seasonal dynamics of energy expenditure.  
346 *Comp. Biochem. Physiol. A Mol. Integr. Physiol.* **137**, 597–604.
- 347 92. Sheffield G, Grebmeier JM. 2009 Pacific walrus (*Odobenus rosmarus divergens*):  
348 differential prey digestion and diet. *Mar. Mamm. Sci.* **25**, 761–777.
- 349 93. Ford MJ et al. 2016 Estimation of a Killer Whale (*Orcinus orca*) Population’s Diet Using  
350 Sequencing Analysis of DNA from Feces. *PLoS One* **11**, e0144956.
- 351 94. Ford JKB, Ellis GM, Barrett-Lennard LG, Morton AB, Palm RS, Balcomb KC III. 1998

- 352 Dietary specialization in two sympatric populations of killer whales (*Orcinus orca*) in coastal  
353 British Columbia and adjacent waters. *Can. J. Zool.* **76**, 1456–1471.
- 354 95. Taylor WA, Lindsey PA, Skinner JD. 2002 The feeding ecology of the aardvark *Orycteropus*  
355 *afers*. *J. Arid Environ.* **50**, 135–152.
- 356 96. Martins H, Milne JA, Rego F. 2002 Seasonal and spatial variation in the diet of the wild  
357 rabbit (*Oryctolagus cuniculus* L.) in Portugal. *J. Zool.* **258**, 395–404.
- 358 97. Wolff JO, Dueser RD, Berry KS. 1985 Food Habits of Sympatric *Peromyscus leucopus* and  
359 *Peromyscus maniculatus*. *J. Mammal.* **66**, 795–798.
- 360 98. Moore BD, Foley WJ. 2000 A review of feeding and diet selection in koalas (*Phascolarctos*  
361 *cinereus*). *Aust. J. Zool.* **48**, 317–333.
- 362 99. Kwiecinski GG. 2006 *Phyllostomus discolor*. *Mammalian Species* **801**, 1–11.
- 363 100. Gaskin DE, Cawthorn MW. 1967 Diet and feeding habits of the sperm whale (*Physeter*  
364 *catodon* L.) in the Cook Strait region of New Zealand. *N. Z. J. Mar. Freshwater Res.* **1**, 156–  
365 179.
- 366 101. Kibaja M. 2014 Diet of the Ashy Red Colobus (*Ptilocolobus tephrosceles*) and Crop-Raiding  
367 in a Forest-Farm Mosaic, Mbuluzi, Rukwa Region, Tanzania. *Primate Conserv.* **28**, 109–116.
- 368 102. Chapman CA, Chapman LJ. 2002 Foraging challenges of red colobus monkeys: influence  
369 of nutrients and secondary compounds. *Comp. Biochem. Physiol. A Mol. Integr. Physiol.*  
370 **133**, 861–875.
- 371 103. McLachlan-Troup TA, Dickman CR, Grant TR. 2010 Diet and dietary selectivity of the  
372 platypus in relation to season, sex and macroinvertebrate assemblages. *J. Zool.* **280**, 237–  
373 246.
- 374 104. Olds N, Shoshani J. 1982 *Procavia capensis*. *Mammalian Species* , 1–7.
- 375 105. Zhang L, Jones G, Zhang J, Zhu G, Parsons S, Rossiter SJ, Zhang S. 2009 Recent  
376 surveys of bats (Mammalia: Chiroptera) from China. I. Rhinolophidae and Hipposideridae.  
377 *Acta Chiropt.* **11**, 71–88.
- 378 106. Guo S, Li B, Watanabe K. 2007 Diet and activity budget of *Rhinopithecus roxellana* in the  
379 Qinling Mountains, China. *Primates* **48**, 268–276.
- 380 107. Hou R, He S, Wu F, Chapman CA, Pan R, Garber PA, Guo S, Li B. 2018 Seasonal  
381 variation in diet and nutrition of the northern-most population of *Rhinopithecus roxellana*.  
382 *Am. J. Primatol.* **80**, e22755.
- 383 108. Pemberton D, Gales S, Bauer B, Gales R, Lazenby B, Medlock K. 2008 The diet of the  
384 Tasmanian Devil, *Sarcophilus harrisii*, as determined from analysis of scat and stomach  
385 contents. *Pap. Proc. R. Soc. Tasman.* **142**, 13–22.
- 386 109. Taylor RJ. 1986 Notes on the diet of the carnivorous mammals of the upper Henty River  
387 region, western Tasmania. In *Papers and Proceedings of the Royal Society of Tasmania*,  
388 pp. 7–10. eprints.utas.edu.au.

- 389 110. Churchfield S. 1982 Food Availability and the Diet of the Common Shrew, *Sorex araneus*,  
390 in Britain. *J. Anim. Ecol.* **51**, 15–28.
- 391 111. Pernetta JC. 1976 Diets of the Shrews *Sorex araneus* L. and *Sorex minutus* L. in Wytham  
392 Grassland. *J. Anim. Ecol.* **45**, 899–912.
- 393 112. Ballari SA, Barrios-García MN. 2014 A review of wild boar *Sus scrofa* diet and factors  
394 affecting food selection in native and introduced ranges : A review of wild boar *Sus scrofa*  
395 diet. *Mamm. Rev.* **44**, 124–134.
- 396 113. Castelblanco-Martínez DN, Morales-Vela B, Hernández-Arana HA, Padilla-Saldivar J. 2009  
397 Diet of the manatees (*Trichechus manatus manatus*) in Chetumal Bay, Mexico. *Lat. Am. J.*  
398 *Aquat. Mamm.* **7**, 39–46.
- 399 114. Santos MB, Fernández R, López A, Martínez JA, Pierce GJ. 2007 Variability in the diet of  
400 bottlenose dolphin, *Tursiops truncatus*, in Galician waters, north-western Spain, 1990–  
401 2005. *J. Mar. Biol. Assoc. U. K.* **87**, 231–241.
- 402 115. McLean BS. 2018 *Urocitellus parryii* (Rodentia: Sciuridae). *Mammalian Species* **50**, 84–99.
- 403 116. Sidorovich VE, Sidorovich AA, Izotova IV. 2006 Variations in the diet and population density  
404 of the red fox *Vulpes vulpes* in the mixed woodlands of northern Belarus. *Mamm. Biol.* **71**,  
405 74–89.
- 406 117. Garcia-Rodriguez FJ, Aurióles-Gamboa D. 2004 Spatial and temporal variation in the diet  
407 of the California sea lion (*Zalophus californianus*) in the Gulf of California, Mexico. *Fish.*  
408 *Bull.* **102**, 47–62.
